# Supplementary material
Source: Copernicus journal article supplement (doi:10.5194/egqsj-2-154-1952)

# Die Vegetationszonen des nördlichen Eurasien während der letzten Eiszeit

von B. Frenzel und C. Troll

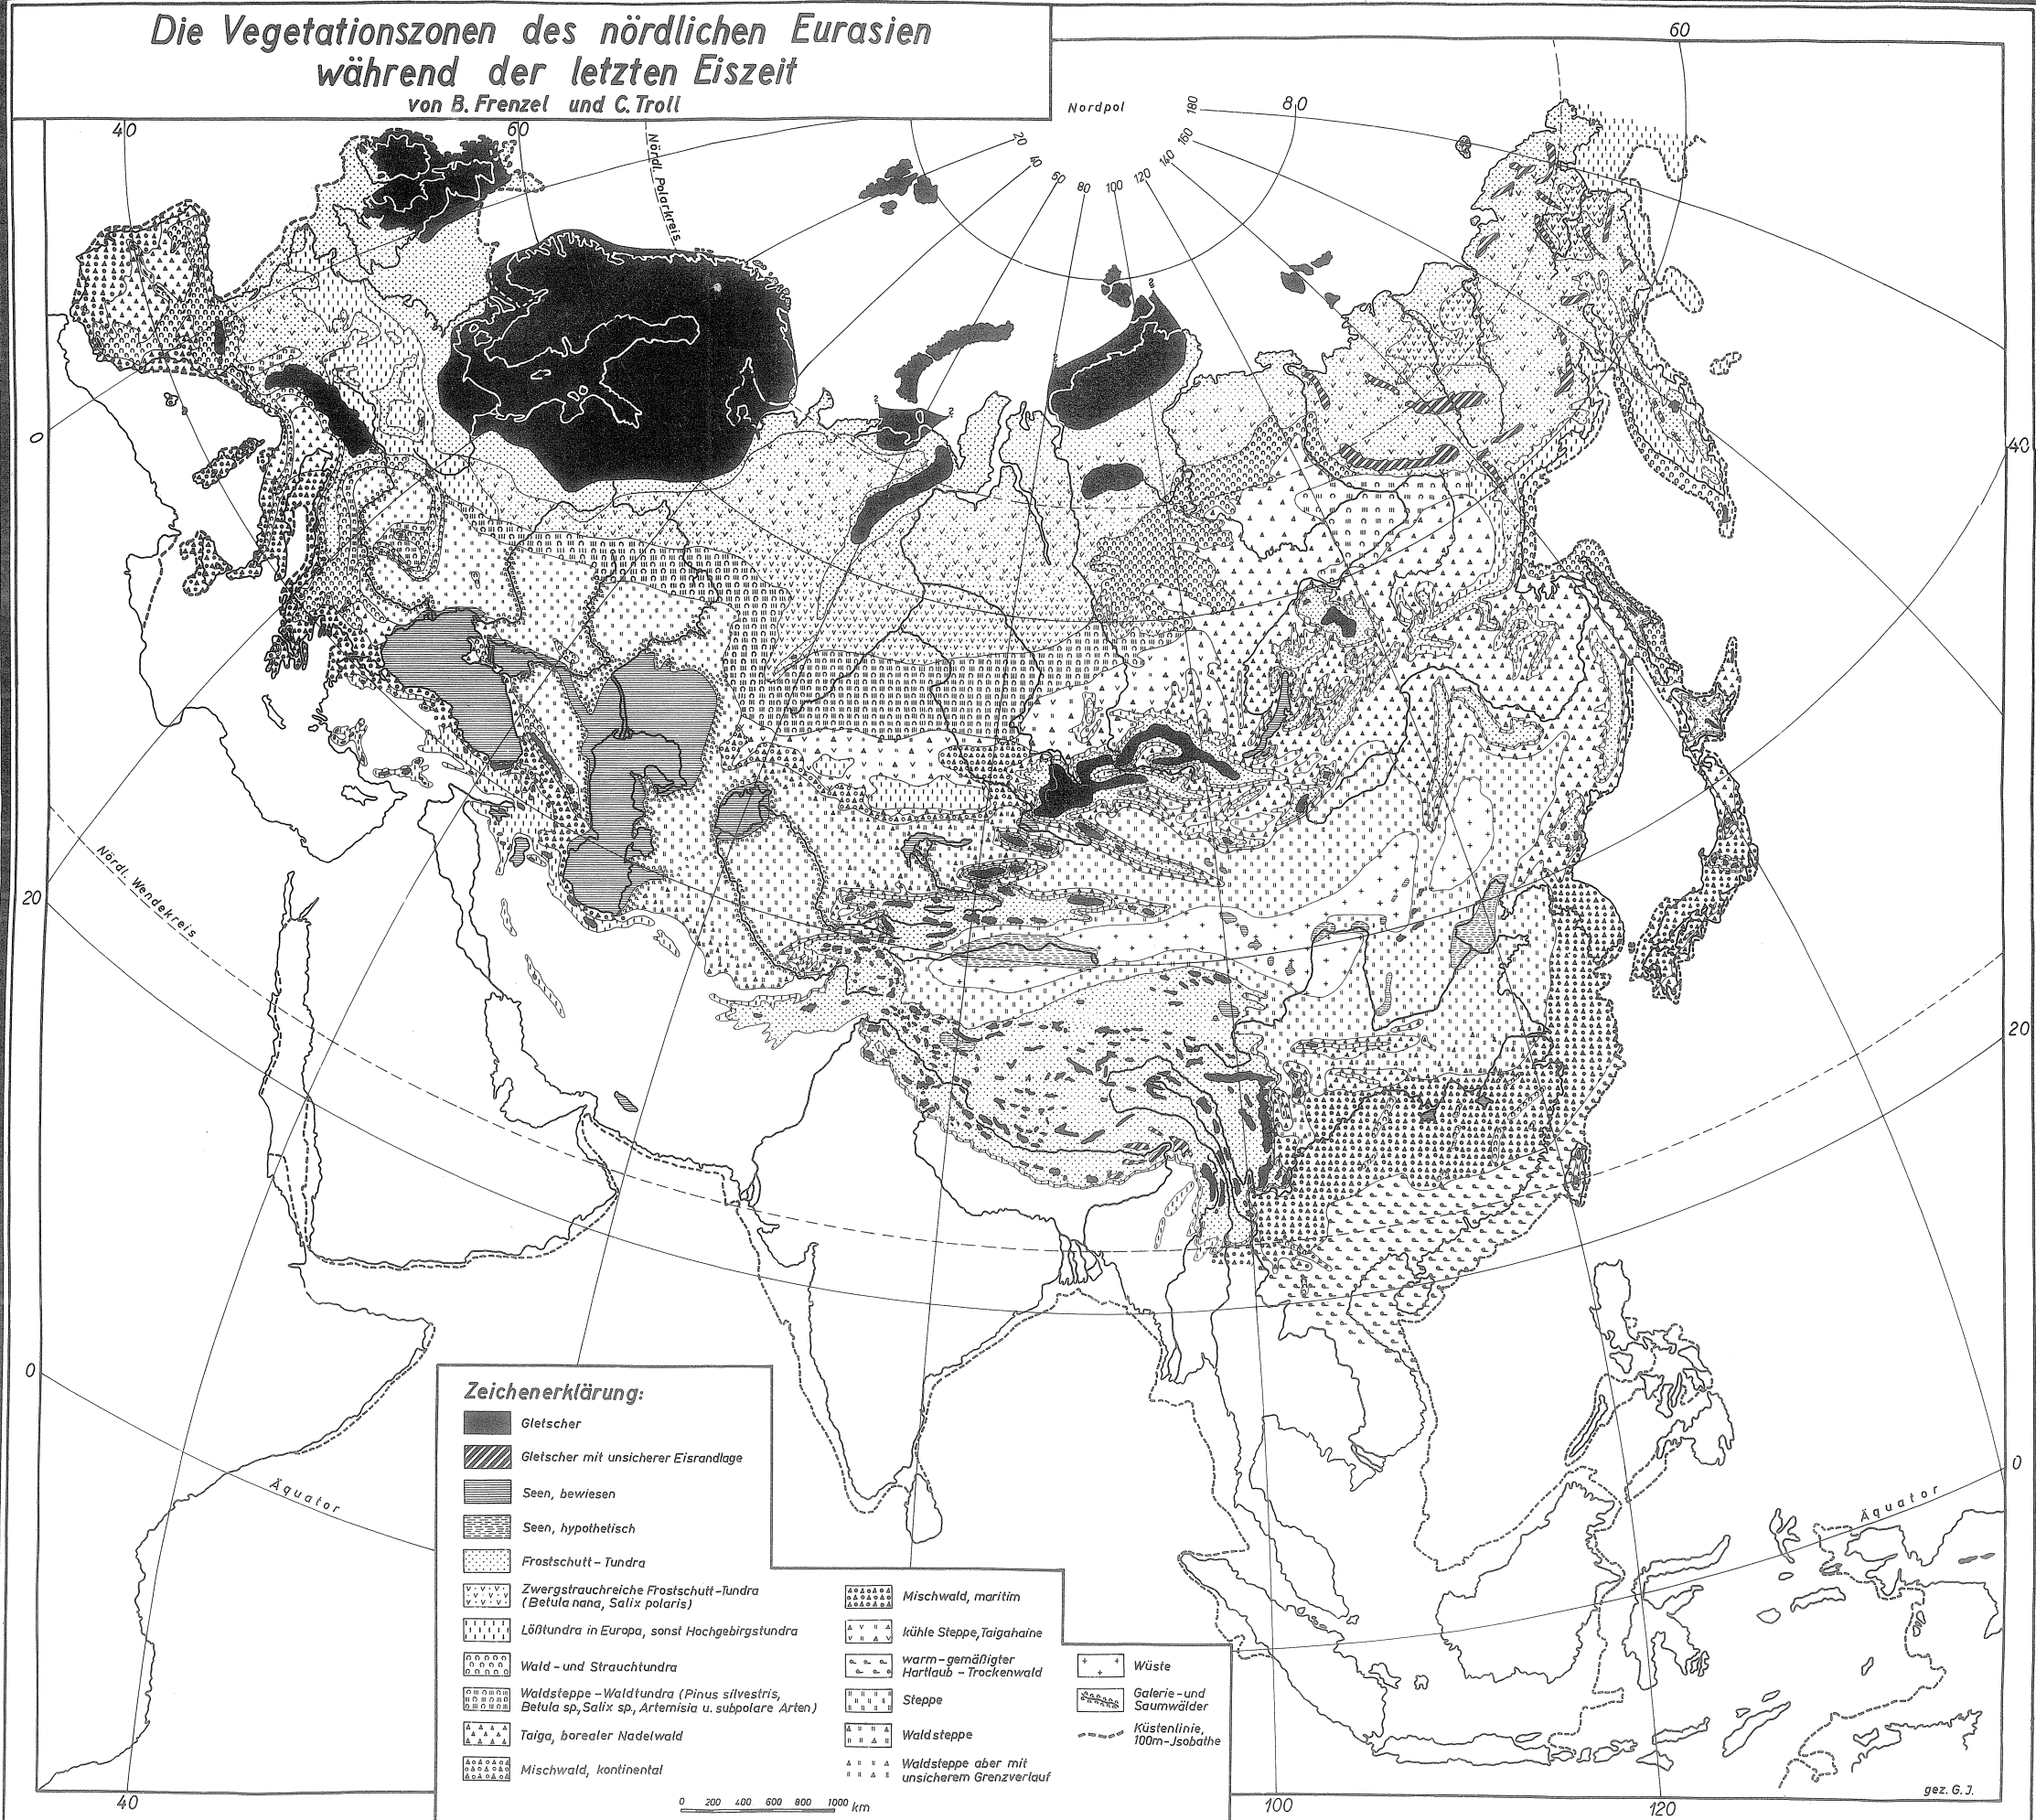

Supplement: Supplementary file 1 [file egqsj-2-154-1952-supplement.pdf]
